# Supplementary material for: Non-autotrophic methanogens dominate in anaerobic digesters
Source: PubMed Central journal article supplement (PMC5431450; doi:10.1038/s41598-017-01752-x), 2017-05-04
Supplement: 41598_2017_1752_MOESM1_ESM.pdf [file 41598_2017_1752_MOESM1_ESM.pdf]

# Non-autotrophic methanogens dominate in anaerobic digesters

- Supplementary Information -

Atsushi Kouzuma<sup>\*</sup>, Maho Tsutsumi, Shun'ichi Ishii, Yoshiyuki Ueno, Takashi Abe, and  
Kazuya Watanabe

\*Corresponding author

E-mail: [akouzuma@toyaku.ac.jp](mailto:akouzuma@toyaku.ac.jp)

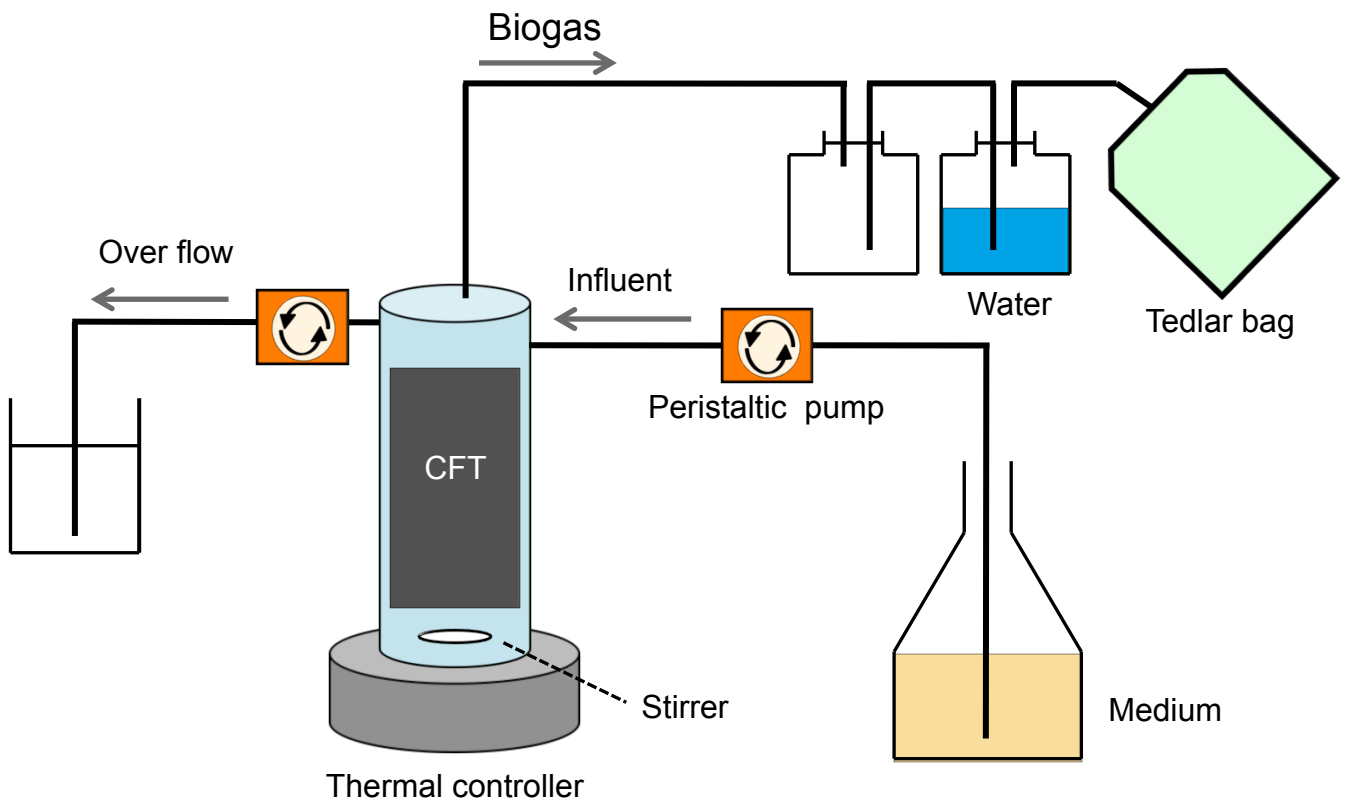

**Figure S1. Configuration of reactors used in this study.**

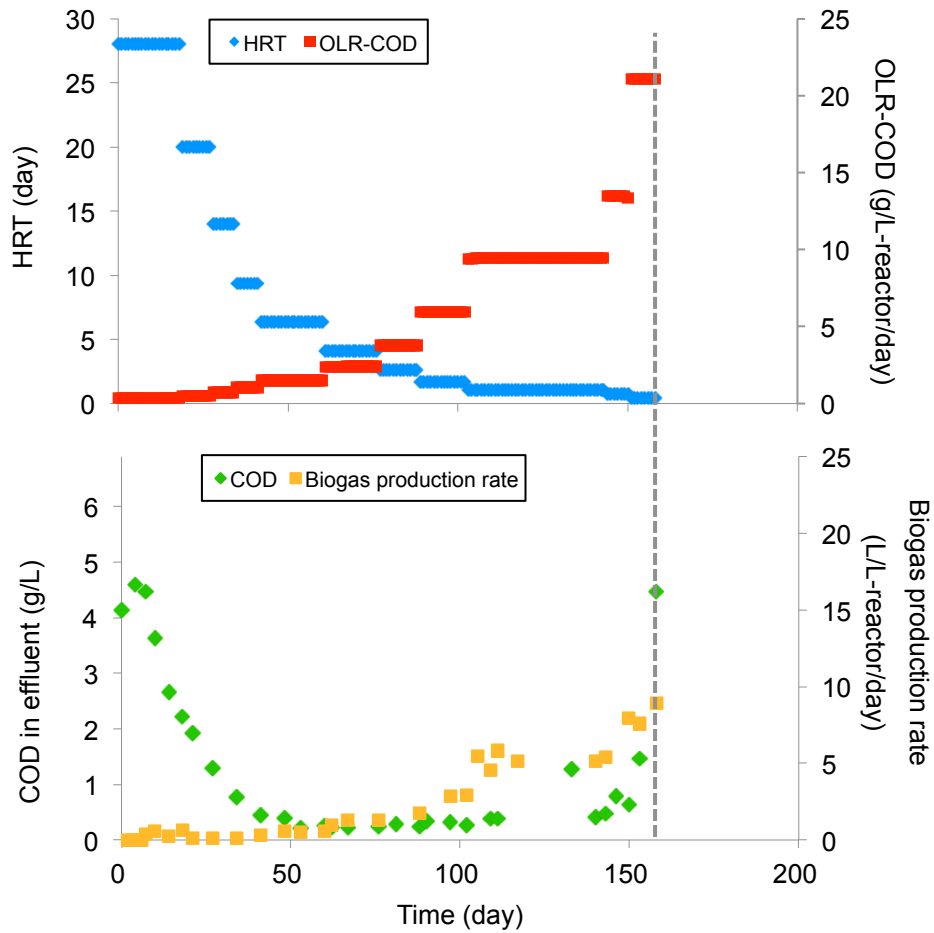

**Figure S2. Time course of OLR, HRT, COD in effluent, and biogas production rates in reactor 2. The sample collection date for the metagenomic and metatranscriptomic analysis (day 159) is indicated by a dotted line.**

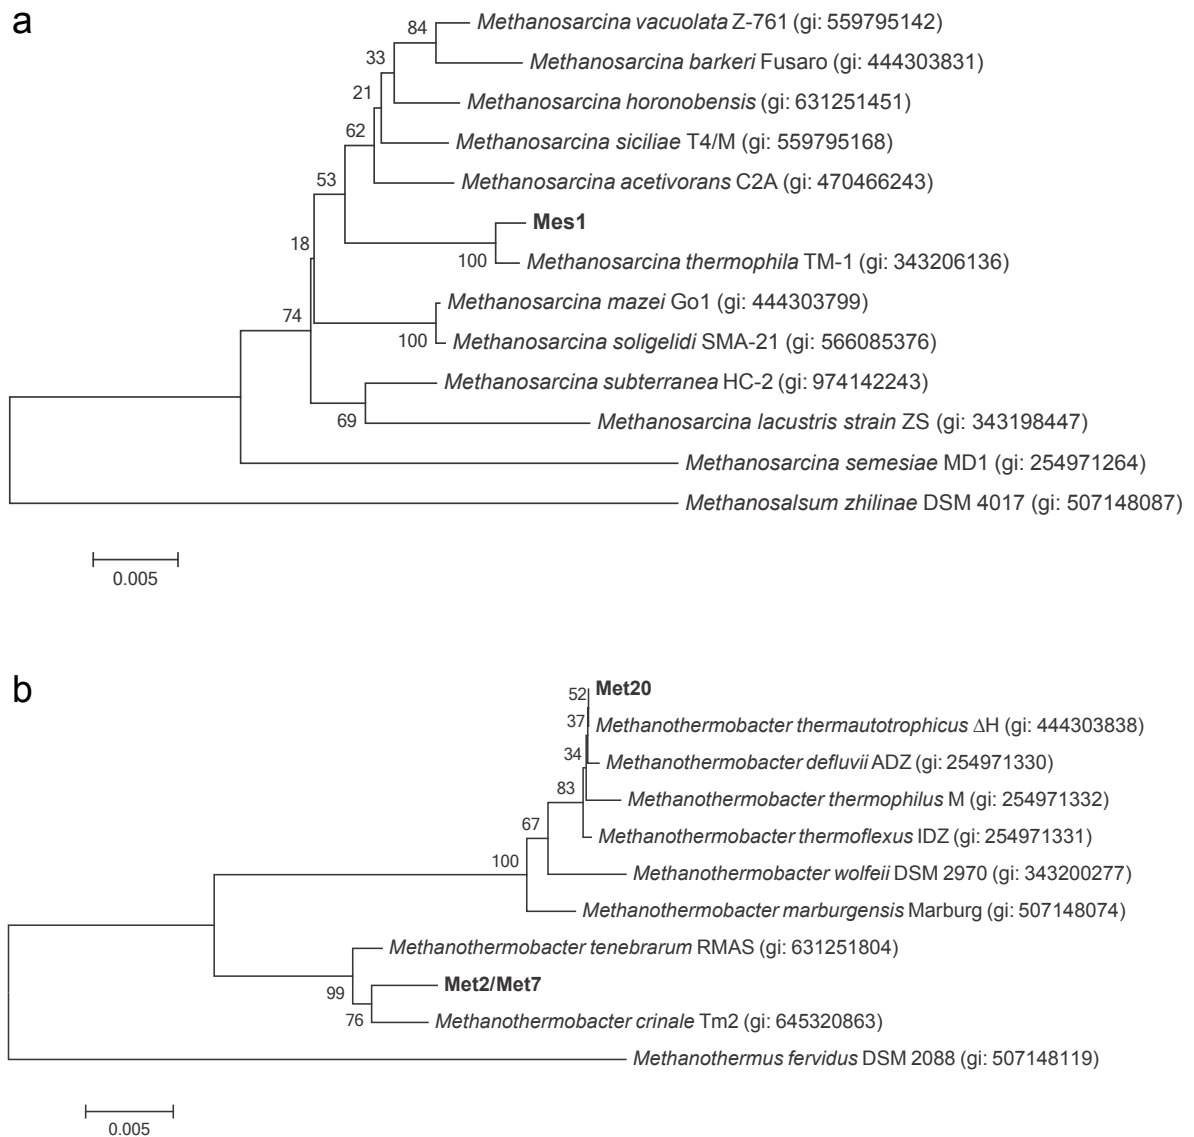

**Figure S3. Neighbor-joining tree based on nucleotide sequences of 16S rRNA genes showing phylogenetic relationships in the genus *Methanosarcina* (a) and *Methanothermobacter* (b). Bootstrap values (100 trials, only >50 are shown) are indicated at branching points. The bar indicates 0.5% sequence divergence. GI numbers are shown in parentheses.**

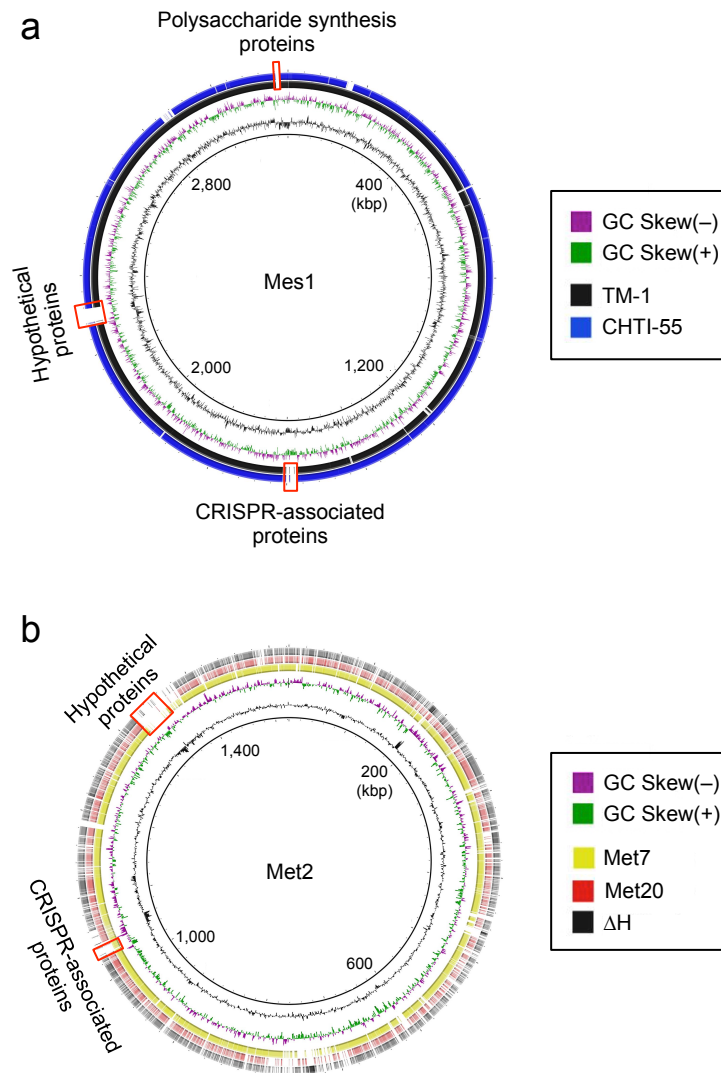

**Figure S4. BRIG images using Mes1 (a) and Met2 (b) genomes as references.** The homology regions with the genomes of Mes1 (BLASTN e-value  $\leq 1e-9$ ) and Met2 (e-value  $\leq 1e-2$ ) are indicated by colors. The first (inner-most) and second circles show the GC content and GC-skew, respectively. The locations of some genes of interest are indicated by red boxes.

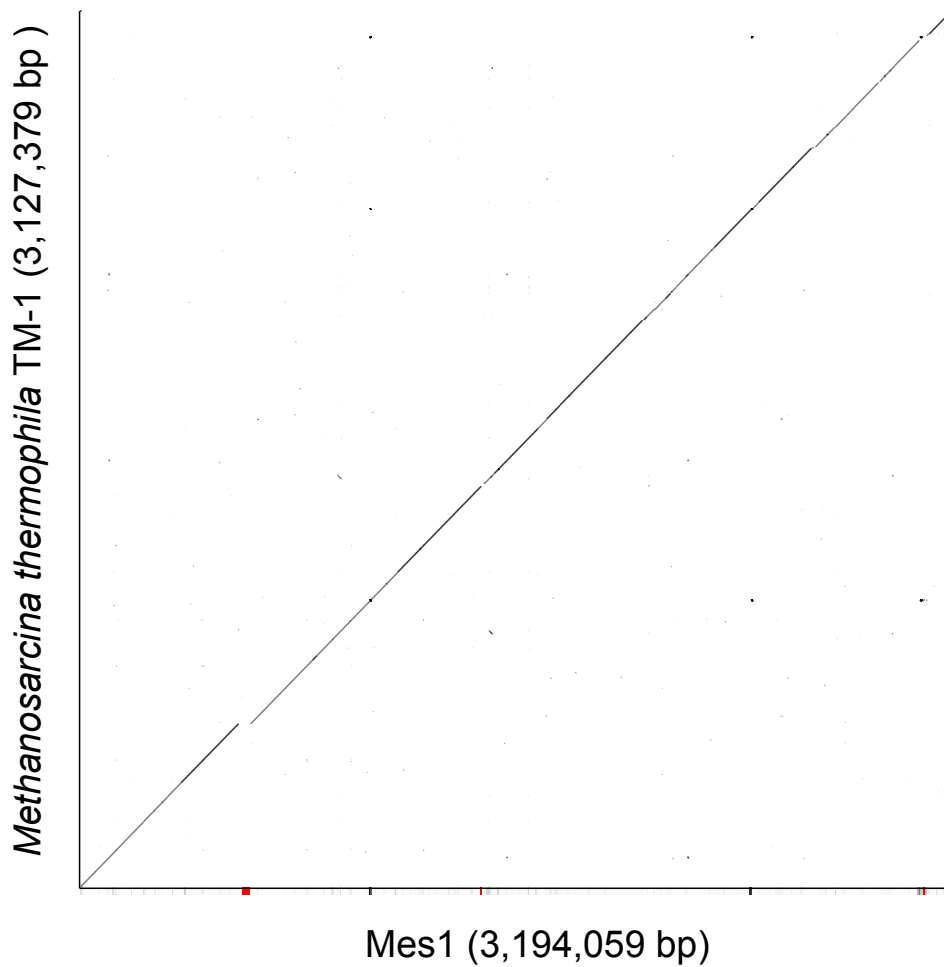

**Figure S5. Synteny dot plot between Mes1 and *Methanosarcina thermophila* TM-1 genomes.** Gray dots represent the homologous DNA region between the two methanogens.

**Table S1.** Performance parameters for reactor 1 and reactor 2.

| Parameter <sup>a</sup>                    |                   | Reactor 1 |         | Reactor 2 |
|-------------------------------------------|-------------------|-----------|---------|-----------|
|                                           |                   | Day 122   | Day 200 | Day 159   |
| HRT (day)                                 |                   | 1.7       | 0.3     | 0.5       |
| OLR (g/L-reactor/day)                     | COD               | 5.9       | 37.2    | 21.1      |
| OLR (g/L-reactor/day)                     | Acetate           | 4.7       | 29.2    | 17.9      |
| Biogas production rate (L/L-reactor/day)  |                   | 3.45      | 22.65   | 8.89      |
| Effluent                                  | COD (mg/L)        | 142       | 1129    | 2971      |
|                                           | Acetate (mg/L)    | 23.6      | 479     | 1723      |
|                                           | Propionate (mg/L) | 9.05      | 65.2    | 63.2      |
|                                           | pH                | 6.9       | 6.7     | 6.4       |
| Removal ratio (%)                         | COD               | 97.2      | 88.7    | 69.8      |
|                                           | Acetate           | 99.2      | 93.9    | 79.3      |
| Methane production yield (%) <sup>b</sup> |                   | 100       | 113     | 100       |
| Biomass (mg/mL) <sup>c</sup>              | PF                | 0.0522    | 0.0281  | 0.359     |
|                                           | BF                | 1.29      | 26.9    | 23.0      |

<sup>a</sup>Data shown are average of values collected during each steady state of operation period.

<sup>b</sup>The ratio of experimental methane production yield to theoretical methane production yield calculated based on COD removal ratio. The theoretical methane potential was calculated from 350 mLCH<sub>4</sub>/gCOD. Methane gas concentration in the biogas was assumed as 58%.

<sup>c</sup>The protein concentration in microbial cells collected from each fraction.

**Table S2.** Summary of metagenomic sequencing and assembly.

| Sample name | Description                   | No. of reads <sup>a</sup> |             | Total read length (bp) | No. of contigs <sup>b</sup> | Total contig length (bp) <sup>b</sup> | N50 (bp) <sup>b</sup> | No. of CDS <sup>b</sup> |
|-------------|-------------------------------|---------------------------|-------------|------------------------|-----------------------------|---------------------------------------|-----------------------|-------------------------|
|             |                               | PF                        | BF          |                        |                             |                                       |                       |                         |
| R1_D122_DNA | DNA from reactor 1 on day 122 | 189,730,176               | 188,992,618 | 37,521,286,131         | 68,129                      | 189,840,872                           | 14,030                | 227,393                 |
| R1_D200_DNA | DNA from reactor 1 on day 200 | 159635878                 | 146,710,738 | 30,218,344,676         | 63,397                      | 169,742,023                           | 13,548                | 208,966                 |
| R2_D159_DNA | DNA from reactor 2 on day 159 | 52,127,542                | 61,078,732  | 11,334,532,371         | 22,754                      | 110,369,745                           | 29,150                | 127,381                 |
| R1_D122_RNA | RNA from reactor 1 on day 122 | -                         | 197,969,722 | 19,994,941,922         | -                           | -                                     | -                     | -                       |
| R1_D200_RNA | RNA from reactor 1 on day 200 | -                         | 55,769,551  | 5,632,724,651          | -                           | -                                     | -                     | -                       |

<sup>a</sup>The number of DNA reads represents the number of DNA reads after being quality-trimmed.

<sup>b</sup>Calculated for contigs more than 500 bp in length.



**Table S3.** Full list of bin-genomes reconstructed in this study.

| Bin ID | Taxonomy <sup>a</sup>      | Frequency <sup>b</sup> (%) |      | Length (Mbp) | CDS  | No. of contigs | Estimated Completeness <sup>c</sup> (%) |
|--------|----------------------------|----------------------------|------|--------------|------|----------------|-----------------------------------------|
|        |                            | PF                         | BF   |              |      |                |                                         |
| Mes1   | <i>Methanosarcina</i>      | 0.1                        | 33.9 | 3.20         | 2772 | 1              | 99                                      |
| Met2   | <i>Methanothermobacter</i> | 3.3                        | 23.9 | 1.52         | 1604 | 1              | 98                                      |
| Cop3   | <i>Coprothermobacter</i>   | 25.6                       | 15.0 | 0.97         | 1146 | 226            | 91                                      |
| Cop4   | <i>Coprothermobacter</i>   | 14.8                       | 8.2  | 1.31         | 1500 | 266            | 84                                      |
| Anb5   | <i>Anaerobaculum</i>       | 6.9                        | 6.4  | 1.50         | 1538 | 147            | 95                                      |
| Clo6   | <i>Clostridium</i> III     | 11.3                       | 1.3  | 3.40         | 3229 | 199            | 92                                      |
| Clo9   | <i>Clostridia</i>          | 2.7                        | 1.2  | 3.20         | 2848 | 222            | 94                                      |
| Met7   | <i>Methanothermobacter</i> | 0.4                        | 1.1  | 1.50         | 1651 | 8              | 97                                      |
| Syn8   | <i>Syntrophaceticus</i>    | 0.3                        | 1.0  | 2.04         | 2075 | 116            | 95                                      |
| Rum11  | <i>Ruminococcaceae</i>     | 1.8                        | 0.8  | 2.38         | 2343 | 189            | 94                                      |
| Lut10  | <i>Lutispora</i>           | 3.2                        | 0.8  | 2.11         | 2086 | 192            | 93                                      |
| Bct12  | <i>Bacteria</i>            | 0.4                        | 0.7  | 2.43         | 2223 | 53             | 91                                      |
| Atr13  | <i>Atribacteria</i>        | 0.2                        | 0.7  | 1.64         | 1677 | 115            | 91                                      |
| Fir16  | <i>Firmicutes</i>          | 2.7                        | 0.4  | 2.24         | 2209 | 87             | 96                                      |
| Unc14  | -                          | 0.5                        | 0.4  | 1.84         | 1784 | 443            | 26                                      |
| Pet15  | <i>Petrotoga</i>           | 0.8                        | 0.4  | 1.95         | 1798 | 76             | 98                                      |
| Eth17  | <i>Ethanoligenens</i>      | 3.1                        | 0.3  | 1.86         | 1708 | 26             | 96                                      |
| Thd18  | <i>Thermodesulfovibrio</i> | 0.0                        | 0.2  | 1.75         | 1781 | 51             | 99                                      |
| Fir25  | <i>Firmicutes</i>          | 0.8                        | 0.2  | 2.45         | 2151 | 94             | 94                                      |
| Rum19  | <i>Ruminococcaceae</i>     | 0.7                        | 0.2  | 2.18         | 1951 | 10             | 97                                      |
| Met20  | <i>Methanothermobacter</i> | 0.0                        | 0.2  | 1.56         | 1678 | 25             | 99                                      |
| Fir23  | <i>Firmicutes</i>          | 1.3                        | 0.2  | 2.32         | 2056 | 23             | 94                                      |
| Unc30  | -                          | 0.8                        | 0.2  | 2.65         | 2704 | 58             | 99                                      |
| Bct26  | <i>Bacteria</i>            | 0.4                        | 0.2  | 2.18         | 2109 | 54             | 97                                      |
| Def24  | <i>Defluviitalea</i>       | 7.7                        | 0.1  | 3.24         | 3099 | 46             | 94                                      |
| Bcr29  | <i>Bacteroidetes</i>       | 0.2                        | 0.1  | 2.12         | 1857 | 213            | 96                                      |
| Unc27  | -                          | 0.3                        | 0.1  | 3.99         | 3435 | 165            | 92                                      |
| Bct36  | <i>Bacteria</i>            | 0.3                        | 0.1  | 2.65         | 2541 | 230            | 88                                      |
| Unc39  | -                          | 0.2                        | 0.1  | 2.22         | 2163 | 137            | 55                                      |
| Tep37  | <i>Tepidanaerobacter</i>   | 0.3                        | 0.1  | 3.19         | 3321 | 73             | 96                                      |
| Unc28  | -                          | 0.2                        | 0.1  | 2.85         | 2376 | 108            | 94                                      |
| Unc21  | -                          | 0.3                        | 0.0  | 2.92         | 2662 | 165            | 96                                      |
| Unc22  | -                          | 0.5                        | 0.0  | 4.01         | 3372 | 105            | 95                                      |
| Bac31  | <i>Bacillus</i>            | 2.1                        | 0.0  | 3.50         | 3663 | 46             | 99                                      |
| Bac32  | <i>Bacillus</i>            | 1.1                        | 0.0  | 3.85         | 3999 | 66             | 98                                      |
| Par35  | <i>Paracoccus</i>          | 0.3                        | 0.0  | 3.49         | 3612 | 276            | 99                                      |
| Acb33  | <i>Acinetobacter</i>       | 0.6                        | 0.0  | 2.73         | 2641 | 25             | 99                                      |
| Ptm38  | <i>Petrimonas</i>          | 0.4                        | 0.0  | 3.65         | 3108 | 57             | 97                                      |
| Pse34  | <i>Pseudomonas</i>         | 0.4                        | 0.0  | 6.42         | 6053 | 90             | 98                                      |

<sup>a</sup>Taxonomic positions assigned by RDP classifier with a confidence threshold of 80%. Unclassified (“Unc”) bin-genomes (i.e., Unc14, Unc21, Unc22, Unc27, Unc28, Unc30, and Unc38) are not classified because 16S rRNA genes were not binned for these bin-genomes.

<sup>b</sup>Calculated based on RPKM values of PF and BF reads for each bin-genome.

<sup>c</sup>Estimated based on the frequency of universal single-copy genes (136 genes for archaea and 105 genes for bacteria) in each bin-genome.

**Table S4.** Nucleotide variation in reconstructed methanogen genomes between day 122 and day 200<sup>a</sup>.

|       | SNV <sup>b</sup> | MNV <sup>c</sup> | Insertion | Deletion |
|-------|------------------|------------------|-----------|----------|
| Mes1  | 4                | 0                | 0         | 0        |
| Met2  | 1                | 2                | 0         | 0        |
| Met7  | 14               | 5                | 0         | 1        |
| Met20 | 1621             | 30               | 23        | 14       |

<sup>a</sup>Values indicate the number of nucleotide variants detected by mapping the day 200 reads to each bin-genome constructed from the day 122 reads.

<sup>b</sup>Single nucleotide variants.

<sup>c</sup>Multiple nucleotide variants.
